# Supplementary material for: Knowledge, attitude, and preventive practices towards COVID-19 and associated factors among adult hospital visitors in South Gondar Zone Hospitals, Northwest Ethiopia
Source: PubMed Central journal article supplement (PMC8128268; doi:10.1371/journal.pone.0250145), 2021-05-17

# PLOS ONE

## Preventive Practice and Associated Factors towards COVID-19 among Medical Visitors in Hospitals of South Gondar Zone, Northwest Ethiopia

--Manuscript Draft--

|                              |                                                                                                                                                                                                                                                                                                                                                                                                                                                                                                                                                                                                                                                                                                                                                                                                                                                                                                                                                                                                                                                                                                                                                                                                                                                                                                                                                                                                                                                                                                                                                                                                                                                                                                                                                                                                                                                                                                                                                                                                                                                                                                                                                                                                                                                                                                                                                                                                                                                                                                                                                                                                                                                                                                                                                                                                                                                                                                                                                                                                                                                                                       |
|------------------------------|---------------------------------------------------------------------------------------------------------------------------------------------------------------------------------------------------------------------------------------------------------------------------------------------------------------------------------------------------------------------------------------------------------------------------------------------------------------------------------------------------------------------------------------------------------------------------------------------------------------------------------------------------------------------------------------------------------------------------------------------------------------------------------------------------------------------------------------------------------------------------------------------------------------------------------------------------------------------------------------------------------------------------------------------------------------------------------------------------------------------------------------------------------------------------------------------------------------------------------------------------------------------------------------------------------------------------------------------------------------------------------------------------------------------------------------------------------------------------------------------------------------------------------------------------------------------------------------------------------------------------------------------------------------------------------------------------------------------------------------------------------------------------------------------------------------------------------------------------------------------------------------------------------------------------------------------------------------------------------------------------------------------------------------------------------------------------------------------------------------------------------------------------------------------------------------------------------------------------------------------------------------------------------------------------------------------------------------------------------------------------------------------------------------------------------------------------------------------------------------------------------------------------------------------------------------------------------------------------------------------------------------------------------------------------------------------------------------------------------------------------------------------------------------------------------------------------------------------------------------------------------------------------------------------------------------------------------------------------------------------------------------------------------------------------------------------------------------|
| <b>Manuscript Number:</b>    | PONE-D-20-36453                                                                                                                                                                                                                                                                                                                                                                                                                                                                                                                                                                                                                                                                                                                                                                                                                                                                                                                                                                                                                                                                                                                                                                                                                                                                                                                                                                                                                                                                                                                                                                                                                                                                                                                                                                                                                                                                                                                                                                                                                                                                                                                                                                                                                                                                                                                                                                                                                                                                                                                                                                                                                                                                                                                                                                                                                                                                                                                                                                                                                                                                       |
| <b>Article Type:</b>         | Research Article                                                                                                                                                                                                                                                                                                                                                                                                                                                                                                                                                                                                                                                                                                                                                                                                                                                                                                                                                                                                                                                                                                                                                                                                                                                                                                                                                                                                                                                                                                                                                                                                                                                                                                                                                                                                                                                                                                                                                                                                                                                                                                                                                                                                                                                                                                                                                                                                                                                                                                                                                                                                                                                                                                                                                                                                                                                                                                                                                                                                                                                                      |
| <b>Full Title:</b>           | Preventive Practice and Associated Factors towards COVID-19 among Medical Visitors in Hospitals of South Gondar Zone, Northwest Ethiopia                                                                                                                                                                                                                                                                                                                                                                                                                                                                                                                                                                                                                                                                                                                                                                                                                                                                                                                                                                                                                                                                                                                                                                                                                                                                                                                                                                                                                                                                                                                                                                                                                                                                                                                                                                                                                                                                                                                                                                                                                                                                                                                                                                                                                                                                                                                                                                                                                                                                                                                                                                                                                                                                                                                                                                                                                                                                                                                                              |
| <b>Short Title:</b>          | Preventive practice of COVID-19 among medical visitors                                                                                                                                                                                                                                                                                                                                                                                                                                                                                                                                                                                                                                                                                                                                                                                                                                                                                                                                                                                                                                                                                                                                                                                                                                                                                                                                                                                                                                                                                                                                                                                                                                                                                                                                                                                                                                                                                                                                                                                                                                                                                                                                                                                                                                                                                                                                                                                                                                                                                                                                                                                                                                                                                                                                                                                                                                                                                                                                                                                                                                |
| <b>Corresponding Author:</b> | Gete Gelaw Berihun, MSc<br>Wollo University<br>Dessie, ETHIOPIA                                                                                                                                                                                                                                                                                                                                                                                                                                                                                                                                                                                                                                                                                                                                                                                                                                                                                                                                                                                                                                                                                                                                                                                                                                                                                                                                                                                                                                                                                                                                                                                                                                                                                                                                                                                                                                                                                                                                                                                                                                                                                                                                                                                                                                                                                                                                                                                                                                                                                                                                                                                                                                                                                                                                                                                                                                                                                                                                                                                                                       |
| <b>Keywords:</b>             | knowledge, attitude, practice visitors, COVID-19                                                                                                                                                                                                                                                                                                                                                                                                                                                                                                                                                                                                                                                                                                                                                                                                                                                                                                                                                                                                                                                                                                                                                                                                                                                                                                                                                                                                                                                                                                                                                                                                                                                                                                                                                                                                                                                                                                                                                                                                                                                                                                                                                                                                                                                                                                                                                                                                                                                                                                                                                                                                                                                                                                                                                                                                                                                                                                                                                                                                                                      |
| <b>Abstract:</b>             | <p><b>Background</b> : Coronavirus 2019 (COVID-19) is a rapidly expanding respiratory disease of the world. The first case of the disease was reported in Wuhan city, Hubei province, China at the end of late December. Healthcare facilities are the most vulnerable area for the transmission of the disease and medical visitors are members of it.</p> <p><b>Objective:</b> To assess preventive practice and associated factors towards COVID-19 among medical visitors in hospitals of South Gondar Zone, Northwest Ethiopia in August 2020.</p> <p><b>Methods:</b> A facility-based cross-sectional study design was applied from August 1 to 30, 2020 among 404 medical visitors using a systematic random sampling technique. Data were collected using a pre-tested face-to-face administered questionnaire. Data were cleaned and entered into Epi data version 3.1 and exported to SPSS Version.25 for statistical analysis. Bivariate logistic regression analysis was done to determine the presence and degree of association between preventive practice and socio-demographic variables. Odds Ratio (OR) with 95% confidence intervals (CI) with p values of less than 0.25 was selected as candidate variables for multivariable logistic regression. Multivariable logistic regression analysis was applied for preventive practice and a statistical significance test was declared at P-value &lt;0.05 and adjusted Odd Ratio (AOR) with 95% CI.</p> <p><b>Results:</b> A total of 404 participants completed the survey questionnaire. Of the participants, 280 (69.3%), 253 (62.6%), 205 (49.3%) have had good knowledge, positive attitude, and good practice respectively towards the prevention of COVID-19. Multivariable logistic regression indicated that educational status of reading and write (AOR=2.78; 95% CI: 1.18, 6.56); college and above (AOR=6.15; 95% CI: 2.18-17.40), and use of social media (AOR=2.96; 95% CI: 1.46, 6.01) were significantly associated with knowledge of COVID-19. Educational status of primary (AOR=6.49; 95% CI: 1.52-27.78) college and above (AOR=6.91; 95% CI: 2.59-14.50) presence of chronic illness (AOR=5.00; 95% CI: 1.71-14.67), training (AOR=3.91; 95% CI: 1.96-7.70), and peer as a source of information (AOR=2.45; 95% CI: 1.06-5.63) were significantly associated with attitude of COVID-19. Occupation of being a student (AOR=7.70; 95% CI: 1.15-15.86) and being good knowledge (AOR=4.49; 95% CI: 2.41-8.39) was significantly associated with prevention practice of COVID-19.</p> <p><b>Conclusion:</b> The findings of this study showed that relatively good knowledge and attitude, however, there was a problem in prevention practice. Most of the participants had reckless practices in the keeping physical distance and the problem of staying at home. Therefore, information dissemination should be conducted on regular basis by health care professionals, and the use of mass media at the entrance of each institution towards the prevention practice of the pandemic.</p> |
| <b>Order of Authors:</b>     | <p>Gete Gelaw Berihun, MSc</p> <p>Zebader Walle Belete</p> <p>Awoke Asfaw Keleb</p> <p>Ayechech Tesema Ademas</p>                                                                                                                                                                                                                                                                                                                                                                                                                                                                                                                                                                                                                                                                                                                                                                                                                                                                                                                                                                                                                                                                                                                                                                                                                                                                                                                                                                                                                                                                                                                                                                                                                                                                                                                                                                                                                                                                                                                                                                                                                                                                                                                                                                                                                                                                                                                                                                                                                                                                                                                                                                                                                                                                                                                                                                                                                                                                                                                                                                     |

| Additional Information:                                                                                                                                                                                                                                                                                                                                                                                                                                                                                                                                                                                                                                                                                                                                                                                                                                                                                                                                                                                                                                                                                                                                                                                                                                                                                                                                                             |                                                                     |
|-------------------------------------------------------------------------------------------------------------------------------------------------------------------------------------------------------------------------------------------------------------------------------------------------------------------------------------------------------------------------------------------------------------------------------------------------------------------------------------------------------------------------------------------------------------------------------------------------------------------------------------------------------------------------------------------------------------------------------------------------------------------------------------------------------------------------------------------------------------------------------------------------------------------------------------------------------------------------------------------------------------------------------------------------------------------------------------------------------------------------------------------------------------------------------------------------------------------------------------------------------------------------------------------------------------------------------------------------------------------------------------|---------------------------------------------------------------------|
| Question                                                                                                                                                                                                                                                                                                                                                                                                                                                                                                                                                                                                                                                                                                                                                                                                                                                                                                                                                                                                                                                                                                                                                                                                                                                                                                                                                                            | Response                                                            |
| <p><b>Financial Disclosure</b></p> <p>Enter a financial disclosure statement that describes the sources of funding for the work included in this submission. Review the <a href="#">submission guidelines</a> for detailed requirements. View published research articles from <a href="#">PLOS ONE</a> for specific examples.</p> <p>This statement is required for submission and <b>will appear in the published article</b> if the submission is accepted. Please make sure it is accurate.</p> <p><b>Unfunded studies</b><br/>Enter: <i>The author(s) received no specific funding for this work.</i></p> <p><b>Funded studies</b><br/>Enter a statement with the following details:</p> <ul style="list-style-type: none"> <li>• Initials of the authors who received each award</li> <li>• Grant numbers awarded to each author</li> <li>• The full name of each funder</li> <li>• URL of each funder website</li> <li>• Did the sponsors or funders play any role in the study design, data collection and analysis, decision to publish, or preparation of the manuscript?</li> <li>• <b>NO</b> - Include this sentence at the end of your statement: <i>The funders had no role in study design, data collection and analysis, decision to publish, or preparation of the manuscript.</i></li> <li>• <b>YES</b> - Specify the role(s) played.</li> </ul> <p>* typeset</p> | <p>The author(s) received no specific funding for this work</p>     |
| <p><b>Competing Interests</b></p> <p>Use the instructions below to enter a competing interest statement for this submission. On behalf of all authors, disclose any <a href="#">competing interests</a> that could be perceived to bias this work—acknowledging all financial support and any other relevant financial or non-financial competing interests.</p>                                                                                                                                                                                                                                                                                                                                                                                                                                                                                                                                                                                                                                                                                                                                                                                                                                                                                                                                                                                                                    | <p>The authors have declared that no competing interests exist.</p> |

This statement **will appear in the published article** if the submission is accepted. Please make sure it is accurate. View published research articles from [PLOS ONE](#) for specific examples.

**NO authors have competing interests**

Enter: *The authors have declared that no competing interests exist.*

**Authors with competing interests**

Enter competing interest details beginning with this statement:

*I have read the journal's policy and the authors of this manuscript have the following competing interests: [insert competing interests here]*

\* typeset

**Ethics Statement**

Enter an ethics statement for this submission. This statement is required if the study involved:

- Human participants
- Human specimens or tissue
- Vertebrate animals or cephalopods
- Vertebrate embryos or tissues
- Field research

Write "N/A" if the submission does not require an ethics statement.

General guidance is provided below. Consult the [submission guidelines](#) for detailed instructions. **Make sure that all information entered here is included in the Methods section of the manuscript.**

Ethical clearance was obtained from the ethical review committee of Debre Tabor University, research, and community service coordinator office. Afterward, consent was obtained from the respective hospital managers of the study site. Informed consent was obtained from each participant after explaining the objective of the study.

**Format for specific study types**

**Human Subject Research (involving human participants and/or tissue)**

- Give the name of the institutional review board or ethics committee that approved the study
- Include the approval number and/or a statement indicating approval of this research
- Indicate the form of consent obtained (written/oral) or the reason that consent was not obtained (e.g. the data were analyzed anonymously)

**Animal Research (involving vertebrate animals, embryos or tissues)**

- Provide the name of the Institutional Animal Care and Use Committee (IACUC) or other relevant ethics board that reviewed the study protocol, and indicate whether they approved this research or granted a formal waiver of ethical approval
- Include an approval number if one was obtained
- If the study involved *non-human primates*, add *additional details* about animal welfare and steps taken to ameliorate suffering
- If anesthesia, euthanasia, or any kind of animal sacrifice is part of the study, include briefly which substances and/or methods were applied

**Field Research**

Include the following details if this study involves the collection of plant, animal, or other materials from a natural setting:

- Field permit number
- Name of the institution or relevant body that granted permission

**Data Availability**

Authors are required to make all data underlying the findings described fully available, without restriction, and from the time of publication. PLOS allows rare exceptions to address legal and ethical concerns. See the [PLOS Data Policy](#) and [FAQ](#) for detailed information.

No - some restrictions will apply

A Data Availability Statement describing where the data can be found is required at submission. Your answers to this question constitute the Data Availability Statement and **will be published in the article**, if accepted.

**Important:** Stating 'data available on request from the author' is not sufficient. If your data are only available upon request, select 'No' for the first question and explain your exceptional situation in the text box.

Do the authors confirm that all data underlying the findings described in their manuscript are fully available without restriction?

**Describe where the data may be found in full sentences. If you are copying our sample text, replace any instances of XXX with the appropriate details.**

- If the data are **held or will be held in a public repository**, include URLs, accession numbers or DOIs. If this information will only be available after acceptance, indicate this by ticking the box below. For example: *All XXX files are available from the XXX database (accession number(s) XXX, XXX).*
- If the data are all contained **within the manuscript and/or Supporting Information files**, enter the following: *All relevant data are within the manuscript and its Supporting Information files.*
- If neither of these applies but you are able to provide **details of access elsewhere**, with or without limitations, please do so. For example:

*Data cannot be shared publicly because of [XXX]. Data are available from the XXX Institutional Data Access / Ethics Committee (contact via XXX) for researchers who meet the criteria for access to confidential data.*

*The data underlying the results presented in the study are available from (include the name of the third party*

the data is available with corresponding author upon request

*and contact information or URL).*

- This text is appropriate if the data are owned by a third party and authors do not have permission to share the data.

\* typeset

Additional data availability information:

1       **COVID-19 Preventive Practice and Associated Factors**  
2       **among Visitors in Hospitals of South Gondar Zone,**  
3       **Northwest Ethiopia**

4  
5  
6   **Gete Berihun<sup>1\*</sup>    Zebader Walle Belete<sup>2</sup>    Awoke Keleb<sup>1</sup>    Ayechew Ademas<sup>1</sup>**

7  
8   <sup>1</sup>Department of Environmental Health, College of Medicine and Health Sciences, Wollo  
9   University, Dessie, Ethiopia.

10   <sup>2</sup>Department of Public Health, College of Health Sciences, Debre Tabor University, Debre  
11   Tabor, Ethiopia.

12  
13  
14   \* corresponding author [geteberihun@gmail.com](mailto:geteberihun@gmail.com)

15  
16  
17  
18  
19  
20

## 21 **Abstract**

22 **Background:** Coronavirus 2019 (COVID-19) is currently the critical health problem of the  
23 globe, including Ethiopia. The first case of the disease was reported in Wuhan city, Hubei  
24 province, China, in late December 2019. Visitors of healthcare facilities are the high-risk groups  
25 due to the presence of suspected and confirmed cases of COVID-19. Even if many trials were  
26 conducted on the vaccine and treatment of the disease, still there is no effective treatment and  
27 vaccine. Therefore, prevention is the most effective method of reducing the transmission of the  
28 disease.

29 **Objective:** To assess COVID-19 preventive practice and associated factors among visitors in  
30 hospitals of South Gondar Zone, Northwest Ethiopia

31 **Methods:** A facility-based cross-sectional study design was applied in August 2020 in visitors  
32 of hospitals of South Gondar zone, Northwest Ethiopia. A total of 404 visitors participated in the  
33 study and were selected using a systematic random sampling technique. The questionnaire was  
34 pre-tested in 5% of the final sample size to establish the validity of the data collection  
35 instrument. The data were collected using face-to-face interviews by considering physical  
36 distancing and wearing of face masks. The data was entered in Epi-data version 3.1 and exported  
37 to Statistical Package for Social Science (SPSS) Version 25 for analysis. Bi-variate Crude Odd  
38 **Ration** (COR) with 95% confidence intervals (CI) and p-values of less than 0.25 were applied to  
39 select candidate variables for multi-variable analysis. Then, multi-variable Adjusted Odd Ratio  
40 (AOR) using binary logistic regression analysis at a p-value of less than 0.05 at 95% CI was



41 statistically significance with the preventive practice of COVID-19 in visitors of hospitals  
42 of South Gondar zone Northwest Ethiopia.

43 **Results:** A total of 404 participants completed the survey questionnaire with a response rate of  
44 95.7%. About 280 (69.3%) had good knowledge, 253 (62.6%) had a positive attitude, and 205  
45 (49.3%) had good preventive practice towards COVID-19. Multi-variable (AOR) logistic  
46 regression analysis indicated that educational status who can read and write (AOR=2.78; 95%  
47 CI: 1.18, 6.56); college and above (AOR=6.15; 95% CI: 2.18-17.40), and use of social media  
48 (AOR=2.96; 95% CI: 1.46, 6.01) were significantly associated with knowledge of COVID-19.  
49 Educational status of primary (AOR=6.49; 95% CI: 1.52-27.78) college and above (AOR=6.91;  
50 95% CI 2.59-14.50), presence of chronic illness (AOR=5.00; 95% CI; 1.71-14.67), training on  
51 COVID-19 (AOR=3.91; 95% CI: 1.96-7.70), and peer/family as a source of information  
52 (AOR=2.45; 95% CI: 1.06-5.63) were significantly associated with attitude of COVID-19. Being  
53 a student (AOR=7.70; 95% CI: 1.15-15.86) and good knowledge on COVID-19 (AOR=4.49;  
54 95% CI: 2.41-8.39) were significantly associated with prevention practice of COVID-19.

55 **Conclusion:** we concluded that only half of the visitors had a good preventive practice of  
56 COVID-19. Most of the participants reported that do not comply with the recommended physical  
57 distance and staying at home. Therefore, the zonal health office should focus on collaboration  
58 with other concerned stakeholders to enhance awareness, attitude, and prevention practice of  
59 COVID-19. Furthermore, the prevention and control strategy should be incorporated with health  
60 extension programs to address all members of the community mainly rural areas.

61 **Keywords:** knowledge, attitude, practice, COVID-19

62

## 63 **Introduction**

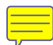

64 COVID-19 is a rapidly emerging pandemic respiratory disease caused by a novel Coronavirus of  
65 Severe Acute Respiratory Syndrome COV-2. Initially, the disease was reported in Wuhan city,  
66 Hubei Province, China at the end of December 2019 (1–3). Later on, at the end of January 2020,  
67 World Health Organization (WHO) announces the disease as a public health emergency of  
68 international concern and then declared it as a global pandemic on March 11 (4–6). Two days  
69 later, the government of Ethiopia reported the first confirmed case of COVID -19 (7,8).

70 COVID-19 transmits mainly through droplets, airborne transmission, and contact between  
71 humans (6,9–11). The major sign and symptoms of COVID-19 cases are fever, dry cough,  
72 fatigue, myalgia, shortness of breath, and dyspnoea (4–6). The Severe cases of COVID-19 can  
73 lead to cardiac injury, respiratory failure, acute respiratory distress syndrome, and death. Elders  
74 and patients with chronic medical illnesses like hypertension, cardiac disease, lung disease,  
75 cancer, or diabetes have been identified as potential risk factors for disease severity and  
76 mortality. Even though the disease has no effective cure, but early recognition of symptoms and  
77 timely seeking of supportive care enhance recovery from the illness. The case fatality rate of the  
78 disease is approximately 3.4% (6,11).

79 According to the Worldometer report, as of October 6, 2020, 9:54 am, COVID-19 spreads to  
80 more than 214 countries across the world. A total of 35,707,844 confirmed cases were reported.  
81 Of them, 26,907,997 recovered and 1,049,700 died of the pandemic (12). The total confirmed  
82 cases of COVID-19 in Ethiopia were 79,437; 1,230 died, and 34,016 recovered (13). The  
83 pandemic of COVID-19 terrifies the whole population of the entire continent. It disrupts the  
84 communities physical, mental health, political, economic, and social stability of countries. The

85 pandemic also threatened the countries economic growth, sense of security, health care system,  
86 trade relations, tourism, employment, and global interactions (14).

87 Due to the absence of cure (6,11) prevention is recommended as the only strategy to protect  
88 against the spread of the pandemic. Universal source control, respiratory hygiene, early  
89 identification and isolation of patients with suspected disease, hand washing, social distancing,  
90 use of Personal Protective Equipment (PPE), and environmental disinfection are the most  
91 common prevention methods of COVID-19 (6,15–18). As a result, the WHO designed different  
92 guidelines and online training programs to alleviate the problems (19). But still, there is a  
93 deficiency of information on its distribution, transmission, treatment, and prevention of the  
94 pandemic (6,18).

95 The government of Ethiopia has also implemented different prevention measures since the first  
96 case of COVID-19. Later on, the country declares and enforces a state of emergency for about  
97 six months starting from early March 2020 (20). However, COVID-19 cases are increasing at an  
98 alarming rate. Therefore, assessing knowledge is important in identifying gaps and strengthening  
99 ongoing prevention methods of the pandemic (4). Even though there are strong initiatives and  
100 recognition of the public health importance of COVID-19, it needs strong reinforcements on  
101 community prevention practice (11).

102 The state of emergency towards COVID-19 prevention was terminated at the end of September  
103 2020. As a result, most populations perceived as the disease was eliminated during the  
104 termination of a state of emergency. As a result, COVID-19 prevention measures being  
105 neglected and confirmed cases of COVID-19 increased from time to time. Even if many studies  
106 were conducted on different aspects of the COVID-19 pandemic in Ethiopia, but scientific

107 evidence on prevention practice of COVID-19 is rare among visitors of healthcare settings.  
108 Therefore, the study was designed to assess COVID-19 prevention practice and associated  
109 factors among visitors in hospitals of South Gondar Zone, Northwest Ethiopia.

## 110 **Methods and Materials**

### 111 **Study design, period, and setting**

112 A facility-based cross-sectional study design was applied among visitors in hospitals of South  
113 Gondar zone, Northwest Ethiopia from August 1 to 30, 2020. South Gondar zone is one of the 15  
114 administrative zones in the Amhara regional state of Ethiopia. Debre Tabor is its capital town  
115 which is located at 597 km to the North of Addis Ababa and 105 km from Bahir Dar which is the  
116 capital city of Amhara regional state. According to the population projection of 2014, the total  
117 population of the study area was 2,364,603 of which 1,196,318 were males while 1,168,285 were  
118 females (population projection 2014). South Gondar zone has a total of eight hospitals of which  
119 seven are district hospitals while Debre Tabor hospital is a general hospital (23).

### 120 **Source population and inclusion criteria**

121 All visitors in hospitals of the South Gondar zone were the source population while all visitors  
122 in two randomly selected hospitals (Debre Tabor and Mekane Eyesus) were the study population.  
123 Visitors who were less than 18 years old and those who were unable to respond due to illness  
124 during data collection were excluded from the study.

### 125 **Sample size estimation and sampling methods**

126 The sample size was determined using the single population proportion formula by taking the  
127 following assumptions.

128 
$$n = \frac{(z_{\alpha/2})^2 * p(1-p)}{d^2}$$

129  $Z_{\alpha/2}$  is the standard normal variable value at (1- $\alpha$ )% confidence level ( $\alpha$  is 0.05 with 95% CI,  $Z_{\alpha/2}$   
130 = 1.96), an estimate of the proportion of knowledge attitude and practice, was considered as 50%  
131 as there was no similar studies conducted and margin of error, 5%. The sample size became 384  
132 and adding 10% non-response rates so that the final sample size becomes 422.

133 Initially, two hospitals were selected using a simple random sampling technique by lottery  
134 method. The patient flow data were estimated by reviewing the patients' logbook in the last three  
135 months and the average number of the patient for a month was calculated to determine the  
136 interval. Then, we used a systematic random sampling technique to select study participants of  
137 the study. Then, the proportional allocation was carried out to determine the number of  
138 participants from each hospital.

## 139 Outcome and explanatory variables

140 The outcome variable was the preventive practice of COVID-19 (good/poor), knowledge  
141 (good/poor), and attitude (good/poor), while explanatory variables comprised of socio-  
142 demographic variables, behavioral variables, pre-existing medical condition, and sources of  
143 information towards COVID-19.

## 144 Operational definitions

145 Knowledge was measured by using 15 questions consisting of signs and symptoms, risk groups  
146 and prognosis, method of transmission, and /preventive methods. Each question was responded  
147 as either yes, no, and I do not know. Respondents who answered correctly were given 1 point

148 while others were given 0 points. The total knowledge score ranges from 0-15 and a cut-off level  
149 of  $\geq 12$  (80% and above) was considered as **good knowledge** while  $< 12$  (80%) was considered as  
150 **poor knowledge** (24). The attitude section was measured by using 11 items and the response  
151 was categorized based on 3 scale measurements with agree (3 points), neutral (2 points), and  
152 disagree (1 point). The score of attitude varies from 11 to 33, with an overall score of  $\geq 26.4$   
153 (80%) was considered as a **positive attitude** (27). The prevention practice was measured using  
154 10 items and those who respond as yes were given 1 point while no was marked as 0. The total  
155 prevention practice score ranges from 0-10 and a score with a cut-off  $\geq 8$  (80%) was considered  
156 as **good practice** while  $< 8$  was taken as a poor practice (25,26).

## 157 **Data collection, management, and quality assurance**

158 The data were collected using a structured questionnaire which was adapted from articles  
159 published in different journals and the WHO guidelines (28–33). The questionnaire consists of  
160 four sections including; part I: socio-demographic characteristics of the participants; part II;  
161 sources of information towards COVID-19; part III: knowledge of the participants; part IV:  
162 Attitude of the participants; and part V: Prevention practice of COVID-19. The tool was  
163 prepared in the English version and translated to Amharic version (local language), and re-  
164 translated back to English to ensure consistency. A pre-test was conducted using 5% (21) of the  
165 final sample size in the Andabet district to establish the validity of the questionnaire and  
166 amendment was made accordingly. The data was collected by using face-to-face-interviews by  
167 considering COVID-19 prevention measures such as wearing of face-mask and keeping a 2-  
168 meter distance from the respondents. The data was collected by four BSc nurse professionals and  
169 supervised by two master's degree holders in public health. Two days of training was given for  
170 data collectors and supervisors on the overall aim of the study, contents of the tool. Supervision

171 was carried out on daily basis, and appropriate corrections were done accordingly. Furthermore,  
172 double data entry was done to control data entry errors and data cleaning was carried before  
173 statistical analysis. The reliability coefficient of Cronbach's alpha was 0.76 which is an  
174 acceptable range.

### 175 **Statistical analysis**

176 Epi-Data version 3.1 was used for data entry and exported to the Statistical Package of the Social  
177 Science (SPSS) version 25.0 for statistical analysis. Bi-variate analysis with (COR) and multi-  
178 variable analysis (AOR) was determined using binary logistic regression analysis with 95% CI.  
179 In the bivariate analysis, variables with  $p < 0.25$  were a candidate for multi-variable analysis.  
180 From the multi-variable logistic regression analysis, variables with a significance level of  $p$   
181  $< 0.05$  were taken as statistically significant and independently associated with outcome  
182 variables. The presence of multi-collinearity among independent variables was checked using  
183 standard error at the cutoff value of 2 with a maximum standard error of 0.97 and model fitness  
184 was checked using the Hosmer-Lemeshow test with a  $p$ -value of 0.65.

185

186

187

188

189

190

191

## 192 **Result**

### 193 **Socio-demographic characteristics of the respondents**

194 A total of 404 visitors participated in the study with a response rate of 95.7%. The majority of  
195 the respondents 242 (59.7%) were females, less than a quarter 92 (22.8%) were in the age of 30-  
196 39, more than three fourth 331(81.9%) of the study participants were orthodox, and 295(73.1%)  
197 were married. Furthermore, 66 (16.3%), 68(16.8%), and 117(29.0%) of the respondents can't  
198 read and write, farmers, and live in rural areas respectively. Similarly, 137 (39.9%) of the  
199 participant took training towards COVID-19 and 252 (62.4%) used social media as a source of  
200 information for COVID-19. Finally, 56 (13.9%) of the participants had either or more chronic  
201 medical illness history (**Table 1**).

### 202 **Knowledge of medical visitors towards COVID-19**

203 The finding of the study showed that 388 (96.0%) of the participants heard about COVID-19  
204 from different sources of information. But a lower number of respondents 322 (79.7%) knew as  
205 COVID-19 is a viral disease while 339 (83.9%) of the respondents knew the major sign and  
206 symptoms of COVID-19 cases. Furthermore, 320 (79.2%) participants knew that elders, those  
207 who had a chronic medical illness, and obese are more likely to have severe cases of COVID-19.  
208 Similarly, 283 (70%) of the respondents knew that COVID-19 can be transmitted from one  
209 person to another even in the absence of COVID-19 (**Table 1**).

210

211



### 212 **Attitude of visitors towards COVID-19**

213 The finding of the study also showed that almost half of 203(50.2%) of the participants agree  
214 that the black race is not protective against COVID-19. Similarly, 180 (44.6%) of the  
215 participants agreed that Ethiopia is in a good position to contain the spread of the COVID-19.  
216 Approximately, two-thirds 274 (67.8%) of the participants believed COVID-19 do not cause  
217 stigma. This finding also indicated that more than half 221(54.7%) of the respondents agree that  
218 they can get infected with COVID-19 if they contacted infected patients despite their good  
219 immunity. On the other hand, 55 (13.6%) of the respondents believed that COVID-19 has  
220 occurred as a result of our sin (**Table 3**).

### 221 **Preventive practice of COVID-19**

222 This finding showed that 378 (93.6%) of the participants washed their hands with water and soap  
223 for at least 20 seconds and three-fourth of the participants used alcohol-based hand rub sanitizers  
224 which contain at least 60% alcohol during the absence of handwashing facilities like water and  
225 soap. Furthermore, almost nine out of ten respondents avoid handshaking practice after the  
226 emergent of COVID-19. But a relatively lower number of 338 (83.7%) participants used  
227 facemasks when they leave their home and 333 (82.4%) practiced respiratory hygiene while  
228 coughing and sneezing. Keeping social distancing was one of the major problems faced by the  
229 respondents and only 177(43.8%) respondents practiced it. Staying at home after the emergent of  
230 COVID-19 was also another challenge and only less than one-third 121(30%) of the participants  
231 applied it as a means of COVID-19 prevention measures (**Table 4**).

232

233

## 234 **Status of Knowledge, attitude, and preventive practice of COVID-19**

235 The finding of the study revealed seven out of ten 280 (69.3%) respondents had good  
236 knowledge towards COVID-19 while 253 (62.6%) had a positive attitude towards COVID-19.

237 The finding of the study showed the pillar of prevention practice was much lower and only half  
238 199(49.3%) of the participants had a score of good prevention practice of COVID-19 (**Figure 1**).

## 239 **Predictors of Knowledge, Attitude, and preventive practice towards** 240 **COVID-19**

241 The multi-variable analysis indicated that educational status and use of social media as a source  
242 of information were statistically significant with the knowledge of COVID-19. The finding  
243 revealed that those who can read and write were 2.78 times more likely to have good knowledge  
244 than those who can't read and write. Similarly, those who have college and above educational  
245 level were 6.15 (2.18-17.40) times more likely to have good knowledge than those who can't  
246 read and write. Additionally, respondents who used social media as a source of information was  
247 2.96 (1.46-6.01) times more likely to have good knowledge than the corresponding group of  
248 those who did not use social media (**Table 5**).

249 The multi-variable analysis revealed that those who had primary education were 6.49 (1.52-  
250 27.78) times more likely to have a positive attitude than those who can't read and write while  
251 college above was 6.91 (2.58-14.5) times more likely to have a positive attitude than the  
252 corresponding reference group. Medical visitors who had chronic medical illnesses were 5.00  
253 (1.71-14.67) more likely to have a positive attitude than those who don't have a chronic illness.  
254 Respondents who took training on COVID-19 were 3.9 (1.96-7.70) more likely to have a  
255 positive attitude than those who didn't take the training.

256 Additionally, participants who used peer and family as a source of information were 2.45 (1.06-  
257 5.63) times more likely to have a positive attitude than those who didn't exchange information  
258 from their peers and families (**Table 6**).

259 The finding also indicates that being a student was 7.70 (1.15-51.86) more likely to have a good  
260 prevention practice as compared to farmers. Similarly, having good knowledge was 4.49 (2.41-  
261 8.39) times more likely to have a good prevention practice than those who had poor knowledge  
262 (**Table 7**).

263

## 264 **Discussion**

265 The pandemic of COVID-19 is still the critical concern of the globe including our country  
266 Ethiopia. But up to date, there is no confirmed treatment for the pandemic. Therefore prevention  
267 is the single most important method of alleviating the spread of the pandemic.

268 In this finding, about 81.67% of the knowledge questions were correctly replied to by the  
269 respondents. This finding was in line with the study conducted in Saudi Arabia (80.5%) (4) and  
270 in Nigeria (77.36) (35). The finding of this study was lower than the study conducted in China  
271 (90%) (36). This discrepancy may be due to variation in the study population's characteristics,  
272 government commitment, and health care system quality on awareness creation. On the contrary,  
273 this study result was higher than in the Egyptian population (71.26%) (37). This discrepancy  
274 might be due to Spatio-temporal variation.

275 The finding of this study revealed that 69.3 % (CI; 65.1-73.8) of the participants had good  
276 knowledge of COVID-19 which was consistent with a finding in India (70 %) (38). On the other

277 hand, the finding of this study was lower than a multicenter study conducted among health care  
278 workers in Ethiopia with 88.2% (16) and Nigerian residents in an urban setting (99.7%) (39).  
279 This deviation may be due to the change in the study population (health care professionals vs.  
280 general population) and residents of the study population.

281 This finding showed that almost all (96%) of the respondents heard about COVID-19 by using  
282 different sources of information. About two-thirds (62.4%) of the participants used social media as  
283 a source of information of COVID-19 which was slightly higher than the study conducted in  
284 Nigeria 55% (39). This deviation may be due to a change in the study period and setting, socio-  
285 demographic characteristics of the study population. On the contrary, this finding was lower than  
286 the study conducted in Ethiopia (73.6%) (16). This deviation may be due to a change in the  
287 heterogeneity of the study population (general population vs. health care professionals), and  
288 variation of participants resident. Furthermore, this study also indicated that about 80% of  
289 participants knew that the elderly, those who had chronic medical illnesses, and obese are more  
290 likely to develop severe cases of COVID-19. This finding was slightly higher than the study  
291 conducted in Ethiopia (72.5%) (11). This variation may be due to the change in Spatio-temporal  
292 variation, socio-demographic characteristics of the study population, and coverage of awareness  
293 creation towards COVID-19. Even though children and young adults are vulnerable groups,  
294 only 83.4% of the participants knew that these groups need to take preventive measures towards  
295 COVID-19. Neglecting such types of the population may wide-spreading the transmission of the  
296 pandemic (11).

297 Regarding the attitudes, 62.6% (95% CI; 57.2-67.6) of respondents had a positive attitude  
298 towards COVID-19 which was lower than the study conducted in Ethiopia (94.7%) (16), Nigeria  
299 79.5% (39), and Pakistan (82.16%) (40). This discrepancy may be due to a change in the study

300 population (health professionals vs general population), government commitment towards  
301 COVID-19. On the other hand, less than half (44.6%) of the participants believed that the  
302 government of Ethiopia can control the spread of COVID-19 within a short time. This finding  
303 was lower than the study conducted in china 97.1% (24) and India at 87.2% (41). This deviation  
304 may be due to the variation in the quality of the health system, socio-demographic characteristics  
305 of the study population, and government preparedness to respond to the control of the pandemic.  
306 The report of WHO showed that the government's of Ethiopia scored only 52% towards  
307 COVID-19 preparedness response (21) which supports the finding of this study. Furthermore,  
308 this study also indicated that almost two-thirds of the respondents believed that the pandemic of  
309 COVID-19 leads to the development of social stigma which was lower than a study conducted in  
310 Ethiopia at 77% (16) and 83.8% (11). This deviation may be due to differences in Spatio-  
311 temporal variation, socio-demographic characteristics of the study population. On the contrary,  
312 this finding was higher than the study conducted in the Peruvian population 59.1% (42). This  
313 variation may be due to a change in the socio-demographic characteristics of the study  
314 population and time, awareness creation towards COVID-19, and the burden of the pandemic.  
315 The social stigma may be developed due to fear of its mortality and high communicability. The  
316 history of social stigma due to pandemic was not a new phenomenon (43,44).

317 Regarding the prevention practice of COVID-19, the overall practice score of the respondents  
318 was 73.2% which was higher than the study conducted in Ethiopia (26). The finding of this study  
319 showed that only half 49.3% of the participants had a good preventive practice of COVID-19.  
320 But this finding was lower than other studies conducted in Ethiopia (16,26) and China (45). This  
321 variation may be due to the change in the study setting, socio-demographic characteristics of the  
322 study population, and occupation of the participant (being a health professional vs. general

Formatted: Justified

323 population). This finding also indicated that 93.6% of the respondents wash their hands with  
324 water and soap for at least 20 seconds which was consistent with the study conducted in Nigeria  
325 96.4% (39). On the contrary, this finding was lower than a study conducted in Nigeria 87.9 %  
326 (35). This deviation may be to a variation in access and proper utilization of handwashing  
327 facilities in health care facilities. Additionally, 83.7% of the participants used face masks which  
328 were consistent with the study conducted in Nigeria 84.4% (35), and 82.3% (39). On the other  
329 hand, less than half (43.8%) of the respondents applied in Keeping physical distance when they  
330 go to public areas. This finding was lower than the study conducted in Nigeria 83% (35) and  
331 92.7%, (39). This variation may be due to a difference in the study population, the burden of the  
332 disease, awareness of the community towards the pandemic, and population way of life. The  
333 finding also revealed that more than two-thirds of 70% of the respondents avoid going to  
334 crowded places after the emergence of COVID-19 which was higher than the finding in Nigeria  
335 58.9% (35). Additionally, 82.4% of the respondents practiced respiratory hygiene which was  
336 lower than the finding in India with a value of (97.7%) (46) which may be due to the variation in  
337 a study setting, heterogeneity of population perception of the community, Knowledge towards  
338 COVID-19, and burden of confirmed COVID-19 cases. Above all, the most common challenge  
339 of COVOD-19 prevention practice was staying at home after the occurrence of COVID-19.  
340 Based on this finding, less than one-third (30%) of the respondents apply it. The possible  
341 justification for this problem may be the stay of the pandemic for a long period of time andmost  
342 Ethiopian population depends on subsistence way of life.

## 343 **Conclusion**

344 In conclusion, the finding of this study showed 70 % of the medical visitors had good knowledge  
345 while 62.4% had a positive attitude towards COVID1-19. But there was a problem in applying to  
346 practice what they know and perceive towards COVID-19. As a result, only half of the  
347 participants had good prevention practices of COVID-19. Seventy percent and above  
348 respondents had practiced most prevention measures of COVID-19 except for keeping of  
349 physical distance and staying at home. Therefore, the zonal health bureau should work in  
350 collaboration with other stakeholders to improve the awareness towards COVID-19 prevention  
351 practice mainly in public gathering areas like markets, schools, healthcare facilities, religious  
352 institutions, and bus stations. Furthermore, the Ethiopian Ministry of Health should link COVID-  
353 19 prevention with health extension programs mainly in rural parts of the country.

## 354 **Abbreviations**

355 COVID-19:Coronavirus disease 2019; 2019-novel coronavirus: 2019-novel coronavirus; AOR:  
356 Adjusted Odds Ratio; ARDS:Acute Respiratory Distress Syndrome; CDC: Communicable  
357 disease control; CI: Confidence Interval; COR: Crude Odds Ratio; COVID\_19: Corona Virus  
358 Disease-2019; CSA: Central Statistical Agency; HCP: Health Care Professionals; HCWs: Health  
359 Care Workers; PHEIC: Public Health Emergency of International Concern; PPE: Personal  
360 Protective Equipment; LMC: Low and Middle-Income Countries; SARAS\_COV-1: Severe  
361 Acute Respiratory Syndrome- Corona Virus-1; SARS-COV-2: Severe Acute Respiratory  
362 Syndrome- Corona Virus-2; SPSS: Statistical Package for Social Science; WHO: World Health  
363 Organization;

## 364 **Declarations**

### 365 **Ethics approval and consent to participate**

366 The study was approved by the ethical review committee of Debre Tabor University. Permission  
367 to conduct the study was obtained from the respective hospital managers of the study site. Before  
368 the data collection, the purpose of the study was explained and verbal consent was obtained from  
369 each participant. Individuals who were volunteer to participate in the study were also told as they  
370 have the right to withdraw from the study at any stage of the interview. The confidentiality of the  
371 study participants was ensured by avoiding possible identifiers. Data collectors wear a facemask  
372 and keep a physical distancing of two feet. Facemask was provided for the study participants  
373 who did not wear it during the data collection.

374

### 375 **Consent for publication**

376 Not applicable

### 377 **Availability of data and material**

378 Data and all the materials will be available from the corresponding author upon request.

### 379 **Conflicts of interest**

380 The authors declare that they have no conflicts of interest.

### 381 **Funding**

382 No extra funding for this study

### 383 **Authors' contributions**

384 **Conceptualization:** Gete Berihun, Zebader Walle Belete, Awoke Keleb, Ayechew Ademas

385 **Data curation:** Gete Berihun, Awoke Keleb, Ayechew Ademas

386 **Formal analysis:** Gete Berihun, Zebader Walle Belete, Awoke Keleb, Ayechew Ademas



387 **Funding acquisition: Investigation:** Gete Berihun, Zebader Walle Belete, Awoke Keleb,  
388 Ayechew Ademas

389 **Methodology:** Gete Berihun, Zebader Walle Belete, Awoke Keleb, Ayechew Ademas

390 **Project administration:** Gete Berihun, Zebader Walle Belete,

391 **Resources:** Gete Berihun, Zebader Walle Belete, Awoke Keleb, Ayechew Ademas

392 **Software:** Gete Berihun, Zebader Walle Belete, Awoke Keleb, Ayechew Ademas

393 **Supervision:** Gete Berihun, Zebader Walle Belete, Awoke Keleb, Ayechew Ademas

394 **Validation:** Gete Berihun, Zebader Walle Belete, Awoke Keleb, Ayechew Ademas

395 **Visualization:** Gete Berihun, Zebader Walle Belete, Awoke Keleb, Ayechew Ademas

396 **Writing – original draft:** Gete Berihun, Zebader Walle Belete, Awoke Keleb

397 **Writing – review & editing:** Gete Berihun, Zebader Walle Belete, Ayechew Ademas

398

## 399 **Acknowledgments**

400 The authors express their heartfelt gratitude to Debretabore University and all the participants of  
401 the study who gave valuable information and their precious time for this study. We are also  
402 grateful for data collectors, supervisors, and Health care facility administrative officials.

## 403 **References**

- 404 1. Elhadi M, Msherghi A, Alkeelani M, Zorgani A, Zaid A, Alsuyihili A, et al. Assessment  
405 of healthcare workers' levels of preparedness and awareness regarding Covid-19 infection  
406 in low-resource settings. *Am J Trop Med Hyg.* 2020;828–33.

- 407 2. WHO Regional Office for Africa. COVID-19 Situation Update for WHO African Region,  
408 External Situation Report. 2020 Jun. Report No.: 15.
- 409 3. Saqlain M, Munir MM, Ur Rehman S, Gulzar A, Naz S, Ahmed Z, et al. Knowledge,  
410 attitude, practice and perceived barriers among healthcare professionals regarding  
411 COVID-19: A Cross-sectional survey from Pakistan. Occupational and Environmental  
412 Health; 2020 Apr.
- 413 4. Al-Hanawi MK, Angawi K, Alshareef N, Qattan AMN, Helmy HZ, Abudawood Y, et al.  
414 Knowledge, Attitude and Practice Toward COVID-19 Among the Public in the Kingdom  
415 of Saudi Arabia: A Cross-Sectional Study. Front Public Heal. 2020;8(May).
- 416 5. Iannone P, Castellini G, Coclite D, Napoletano A, Fauci AJ, Iacorossi L, et al. The need  
417 for health policy perspective to protect Healthcare Workers during COVID-19 pandemic.  
418 A GRADE rapid review on the effectiveness of the N95 respirator. PLoS One [Internet].  
419 2020;15(6):1–13. Available from: <http://dx.doi.org/10.1371/journal.pone.0234025>
- 420 6. Nallani VRR, Nadendla RR, Kavuri NSS. Knowledge, attitude, and practice among health  
421 care professionals regarding COVID-19 and barriers faced by health care professionals  
422 in South India. Int J Community Med Public Heal. 2020;7(9):3450.
- 423 7. Lone SA, Ahmad A. COVID-19 pandemic – an African perspective. :10.
- 424 8. Baye K. COVID-19 prevention measures in Ethiopia Current realities and prospects. The  
425 Federal Democratic Republic of Ethiopia Policy Studies Institute; 2020.

- 426 9. Ssebuufu R, Katembo Sikakulya F, Binezero SM, Wasingya L, Nganza SK, Ibrahim B, et  
427 al. Awareness knowledge attitude and practice towards measures for prevention of the  
428 spread of COVID-19 in the Ugandans A nationwide online cross-sectional Survey.  
429 Medrxiv. 2020;1–28.
- 430 10. WHO. COVID-19 Strategic Preparedness and Response Plan Operational Planning  
431 Guideline to Support Country Preparedness and Response. 2020.
- 432 11. Kebede Y, Yitayih Y, Birhanu Z, Mekonen S, Ambelu A. Knowledge, perceptions and  
433 preventive practices towards COVID-19 early in the outbreak among Jimma university  
434 medical center visitors, Southwest Ethiopia. PLoS One [Internet]. 2020;15(5):1–15.  
435 Available from: <http://dx.doi.org/10.1371/journal.pone.0233744>
- 436 12. Worldometer Report COVID-19 coronavirus pandemic 2020.  
437 <https://www.worldometers.info/coronavirus>, 2020 accessed date October 6, 2020, 9.54 am
- 438 13. Worldometer report.COVID 19 coronavirus pandemic 2020.  
439 <https://www.worldometers.info/coronavirus/country/ethiopia,2020> accessed date October  
440 6, 2020, 9.54 am
- 441 14. Nigussie T.F and Azimach N.N. Knowledge, Attitude and Practice towards COVID-19  
442 among Arba Minch Town GSJ : Volume 8, Issue 6, June 2020, Online : ISSN 2320-9186
- 443 15. CDC. Infection prevention and control for COVID-19 in healthcare settings - first update  
444 12 March 2020. Eur Cent Dis Prev Control. 2020;(March):1–10.

- 445 16. Jemal B, Ferede ZA, Mola S, Hailu S, Abiy S, Wolde GD, et al. Knowledge, attitude, and  
446 practice of healthcare workers towards COVID-19 and its prevention in Ethiopia: a  
447 multicenter study. In Review; 2020 May.
- 448 17. Olum R, Chekwech G, Wekha G, Nassozi DR, Bongomin F. Coronavirus Disease-2019:  
449 Knowledge, Attitude, and Practices of Health Care Workers at Makerere University  
450 Teaching Hospitals, Uganda. *Front Public Heal.* 2020 Apr;8:181.
- 451 18. Lakshmi Priyadarsini S, Suresh M. Factors influencing the epidemiological characteristics  
452 of pandemic COVID 19: A TISM approach. *Int J Healthc Manag.* 2020;13(2):89–98.
- 453 19. Saqlain M, Munir MM, Rehman SU, ... Knowledge, attitude, practice and perceived  
454 barriers among healthcare professionals regarding COVID-19: A Cross-sectional survey  
455 from Pakistan. *J ...* [Internet]. 2020; Available from  
456 <https://www.ncbi.nlm.nih.gov/pmc/articles/PMC7211584/>
- 457 20. Goshu D, Ketema M. Assessment of COVID-19 Effects and Response Measures in  
458 Ethiopia : Livelihoods and Welfare Implications Assessment of COVID-19 Effects and  
459 Response Measures in Ethiopia : Livelihoods and Welfare Implications 1. 2020.
- 460 21. Tolu LB, Ezeh A, Feyissa GT. How Prepared Is Africa for the COVID-19 Pandemic  
461 Response ? The Case of Ethiopia What Measures Should Be Taken to. 2020;
- 462 22. Alemayehu TY, Boled AT, Taye MG, Kibret S. Assessment of emergency and essential  
463 surgical service in primary hospitals of South Gondar zone, Amhara region, Ethiopia, 2019  
464 *International Journal of Surgery Open Assessment of emergency and essential surgical*

- 465 service in primary hospitals of South Gondar zone, Amhara region, Ethiopia, 2019. *Int J*  
466 *Surg Open* [Internet]. 2020;23(February):35–8. Available from:  
467 <https://doi.org/10.1016/j.ijso.2020.02.003>
- 468 23. Abate BA, Ahunie MA. Basic Emergency Maternal And Neonatal Care Status Of South  
469 Gon- Dar Zone, North Central Ethiopia: Institutional Descriptive Sur- Vey, June 2016.  
470 2017;9(1):11.
- 471 24. Giao H, Han NTN, Khanh T Van, Ngan VK. Knowledge and attitude toward COVID-19  
472 among healthcare workers at District 2 Hospital, Ho Chi Minh City. *Asian Pac J Trop*  
473 *Med.* :7.
- 474 25. Defar A, Molla G, Abdella S, Tessema M, Ahmed M, Tadele A et. al. Knowledge,  
475 Practice and associated factors towards the Prevention of COVID-19 among high-risk  
476 groups: A cross-sectional study in Addis Ababa, Ethiopia. 2020;19.
- 477 26. Asemahagn MA. Factors determining the knowledge and prevention practice of healthcare  
478 workers towards COVID-19 in the Amhara region, Ethiopia : a cross-sectional survey.  
479 2020;3.
- 480 27. Salman M, Mustafa ZU, Asif N, Zaidi HA, Shehzadi N. Knowledge, attitude and  
481 preventive practices related to COVID-19 among health professionals of Punjab province  
482 of Pakistan.
- 483 28. WHO E. Survey Tool And Guidance Rapid, simple, flexible behavioral insights on  
484 COVID-19. 2020.

- 485 29. Ahmad NA, Ahmad W, Arman R, Rahimi W, Ahmadi A, Vijay Raghavan SMS.  
486 Community Perception Survey – COVID 19 Knowledge, Attitude, and Practice Survey in  
487 Kabul, Kunduz, and Khost Province. the JOHANNITER international assistance, JACK,  
488 OHW; 2020.
- 489 30. National Comprehensive Covid19 Management Handbook. :162.
- 490 31. National Institute of Environmental Health Science. COVID-  
491 19\_BSSR\_Research\_Tools.pdf. 2020.
- 492 32. Admissions R, Homes R. COVID-19 : Infection Prevention and Control Checklist for  
493 Long-Term Care and Retirement Homes. 2020;1–15.
- 494 33. WHO. COVID-19 Infection Prevention and Control Sameeksha. 2020;2.
- 495 34. Ahmed N, Shakoor M, Vohra F, Abduljabbar T, Mariam Q, Rehman MA. Knowledge,  
496 Awareness, and Practice of Health care Professionals amid SARS-CoV-2, Corona Virus  
497 Disease Outbreak. :8.
- 498 35. Okoro J, Ekeroku A, Nweze B, Odionye T, Nkire J, Onuoha M, et al. Attitude and  
499 preventive practices towards COVID-19 disease and the impact of awareness training on  
500 knowledge of the disease among correctional officers [ version 1 ; peer review : awaiting  
501 peer review ]. 2020;1–10.
- 502 36. Zhong B, Luo W, Li H, Zhang Q, Liu X, Li W, et al. Knowledge, attitudes, and practices  
503 towards COVID-19 among Chinese residents during the rapid rise period of the COVID-  
504 19 outbreak : a quick online cross-sectional survey. 2020;16.

- 505 37. Abdelhafiz AS, Mohammed Z, Ibrahim ME, Ziady HH, Alorabi M, Ayyad M, et al.  
506 Knowledge, Perceptions, and Attitude of Egyptians Towards the Novel Coronavirus  
507 Disease (COVID-19). *J Community Health* [Internet]. 2020;45(5):881–90. Available  
508 from: <https://doi.org/10.1007/s10900-020-00827-7>
- 509 38. Singh JP, Sewda A. Assessing the Knowledge, Attitude, and Practices of Students  
510 Regarding the COVID-19 Pandemic. 2020;
- 511 39. Christopher R, Margaret R, Dauda MAD, Saleh A, Ene P. Knowledge, Attitudes and  
512 Practices Towards COVID - 19 : An Epidemiological Survey in North - Central Nigeria. *J*  
513 *Community Health* [Internet]. 2020; (0123456789). Available from:  
514 <https://doi.org/10.1007/s10900-020-00881-1>
- 515 40. Hussain I, Majeed A, Imran I, Ullah M, Hashmi FK, Saeed H, et al. Knowledge, Attitude,  
516 and Practices Toward COVID - 19 in Primary Healthcare Providers : A Cross-Sectional  
517 Study from Three Tertiary Care Hospitals of Peshawar, Pakistan. *J Community Health*  
518 [Internet]. 2020;(0123456789). Available from: [https://doi.org/10.1007/s10900-020-](https://doi.org/10.1007/s10900-020-00879-9)  
519 [00879-9](https://doi.org/10.1007/s10900-020-00879-9)
- 520 41. S DP, B KR, Athul K, Swamy S, Bhodaji S, Deshmukh A, et al. Knowledge, Attitude,  
521 Awareness and Practice Towards Covid-19 Pandemic in Indian Citizens During The  
522 National Lockdown Period : A Quick Online Cross-. 2020;8(May):3504–15.
- 523 42. Zegarra-Valdivia, J. A. 1; Chino-Vilca, B. N. 1; & Ames-Guerrero R. Knowledge,  
524 perception and attitudes regarding COVID-19 Pandemic in Peruvian Population.

- 525 43. Person B, Sy F, Holton K, Govert B, Liang A, Sars N. Fear, and Stigma : The Epidemic  
526 within the SARS Outbreak. 2004;10(2).
- 527 44. Paget J. ITALIAN OF PUBLIC HEALTH The influenza pandemic and Europe : the social  
528 impact and public health response OF PUBLIC. 2009;6(3):257–9.
- 529 45. Zhou M, Tang F, Wang Y, Nie H, Zhang L, You G, et al. Knowledge, attitude and  
530 practice regarding COVID-19 among health care workers in Henan, China. J Hosp Infect  
531 [Internet]. 2020; Available from <https://doi.org/10.1016/j.jhin.2020.04.012>
- 532 46. Awasthi AA, Taneja N, Janardhanan R. Knowledge, Attitude And Practice Towards  
533 Covid-19 Pandemic Among Residents Of Bihar, India. 2020;11(D):38990–5.

534  
535  
536  
537  
538  
539  
540  
541

542 **Table 1: Socio-demographic characteristics of medical visitors in hospitals of South Gondar**  
543 **zone Northwestern Ethiopia, in August 2020 (n=404)**

| Variable | Category | Frequency | Percentage |
|----------|----------|-----------|------------|
| Sex      | Male     | 163       | 40.3       |



|                                                    |                         |     |      |
|----------------------------------------------------|-------------------------|-----|------|
|                                                    | Female                  | 241 | 59.7 |
| Age(years)                                         | <20                     | 24  | 5.9  |
|                                                    | 20-29                   | 92  | 22.8 |
|                                                    | 30-39                   | 111 | 27.5 |
|                                                    | 40-49                   | 94  | 23.3 |
|                                                    | 50-59                   | 48  | 11.9 |
|                                                    | ≥60                     | 35  | 8.7  |
| Religion                                           | Muslim                  | 30  | 7.4  |
|                                                    | Orthodox                | 331 | 81.9 |
|                                                    | Protestant              | 43  | 10.6 |
| Marital status                                     | Single                  | 83  | 20.5 |
|                                                    | Married                 | 295 | 73.1 |
|                                                    | Divorced                | 26  | 6.5  |
| Educational status                                 | Cannot read and write   | 66  | 16.3 |
|                                                    | Read and write          | 95  | 23.5 |
|                                                    | Primary (1-8) grade     | 36  | 8.9  |
|                                                    | Secondary (9-12)grade   | 29  | 7.2  |
|                                                    | College and above       | 178 | 44.1 |
| Occupation                                         | Farmer                  | 68  | 16.8 |
|                                                    | Student                 | 45  | 11.1 |
|                                                    | Unemployed              | 55  | 13.6 |
|                                                    | Government employer     | 129 | 31.9 |
|                                                    | Private business worker | 107 | 26.5 |
| Resident                                           | Urban                   | 287 | 71.0 |
|                                                    | Rural                   | 117 | 29.0 |
| Monthly income(ETB)                                | ≤499                    | 127 | 31.4 |
|                                                    | 500-2000                | 101 | 25   |
|                                                    | ≥2001                   | 176 | 43.6 |
| History of chronic medical illness                 | Yes                     | 56  | 13.9 |
|                                                    | No                      | 348 | 86.1 |
| Training on COVID 19                               | Yes                     | 137 | 33.9 |
|                                                    | No                      | 267 | 64.1 |
| Use social media                                   | Yes                     | 252 | 62.4 |
|                                                    | No                      | 152 | 37.6 |
| Peer as a source of information of COVID19         | Yes                     | 345 | 85.4 |
|                                                    | No                      | 59  | 14.6 |
| Use TV/radio as a source of information            | Yes                     | 321 | 79.5 |
|                                                    | No                      | 83  | 20.5 |
| Use religious institution as source of information | Yes                     | 130 | 32.2 |
|                                                    | No                      | 274 | 67.8 |

544

545 **Table 2: Knowledge of medical visitors towards COVID-19 in hospitals of South Gondar**  
546 **zone, Northwestern Ethiopia, in August 2020 (n=404)**

| Item | Yes       |   | No        |   | I do not know |   |
|------|-----------|---|-----------|---|---------------|---|
|      | Frequency | % | Frequency | % | Frequency     | % |

|                                                                                                                                               |     |      |    |      |    |      |
|-----------------------------------------------------------------------------------------------------------------------------------------------|-----|------|----|------|----|------|
| Did you hear about COVID-19?                                                                                                                  | 388 | 96.0 | 16 | 4.0  |    |      |
| COVID-19 is a viral disease.                                                                                                                  | 322 | 79.7 | 40 | 9.9  | 42 | 10.4 |
| The major sign and symptoms of COVID-19 are dry cough, fever, and shortness of breathing.                                                     | 339 | 83.9 | 33 | 8.2  | 32 | 7.9  |
| Runny nose and sneezing are less common symptoms of COVID-19.                                                                                 | 275 | 68.1 | 88 | 21.8 | 41 | 10.1 |
| Elder, those who have a chronic medical illness and obese are more likely to sever the case of COVID-19.                                      | 320 | 79.2 | 57 | 14.1 | 27 | 6.7  |
| Currently, there is no effective cure for COVID-19.                                                                                           | 331 | 81.9 | 50 | 12.4 | 23 | 5.7  |
| COVID-19 virus can spread via respiratory droplets.                                                                                           | 375 | 92.8 | 29 | 7.2  |    |      |
| Eating and contacting wild animals would result COVID-19 infection                                                                            | 308 | 76.2 | 53 | 13.1 | 43 | 10.6 |
| Persons with COVID 19 virus can transmit the virus to others when a fever is not present                                                      | 283 | 70.0 | 71 | 17.6 | 50 | 12.4 |
| Proper washing hand with soap and water is one method of preventing COVID-19.                                                                 | 375 | 92.8 | 18 | 4.5  | 11 | 2.7  |
| Wearing general masks can prevent one from acquiring infection by the COVID 19 virus                                                          | 354 | 87.6 | 35 | 8.7  | 15 | 3.7  |
| Children and young adults must take measures to prevent the infection by Covid 19 virus                                                       | 337 | 83.4 | 45 | 11.1 | 22 | 5.4  |
| To prevent the infection by COVID 19 virus individuals should avoid going to crowded places such as bus parks and avoid public transportation | 352 | 87.1 | 50 | 12.4 | 2  | .5   |
| People who have contact with someone infected with COVID 19 virus should be                                                                   | 273 | 67.6 | 95 | 23.5 | 36 | 8.9  |

|                                                                                                                                 |                   |      |    |      |    |     |
|---------------------------------------------------------------------------------------------------------------------------------|-------------------|------|----|------|----|-----|
| immediately isolated in a proper place in general the observation period is 14 days                                             |                   |      |    |      |    |     |
| Isolation and treatment of people who are infected with the COVID 19 virus are effective ways to reduce the spread of the virus | 295               | 73.0 | 80 | 19.8 | 29 | 7.2 |
| Mean± standard deviation                                                                                                        | <b>12.25±2.45</b> |      |    |      |    |     |
| Minimum                                                                                                                         | <b>2.00</b>       |      |    |      |    |     |
| Maximum                                                                                                                         | <b>15</b>         |      |    |      |    |     |

547

548 **Table 3:-Attitude of medical visitors towards COVID-19 in hospitals ofSouth Gondar zone,**  
549 **Northwest Ethiopia, in August 2020 (n=404)**

| Item                                                                                          | Agree |       | Neutral |       | Disagree |       |
|-----------------------------------------------------------------------------------------------|-------|-------|---------|-------|----------|-------|
| Black races are not protected from COVID 19 disease.                                          | 203   | 50.2% | 146     | 36.1% | 55       | 13.6% |
| Wearing a well-fitting face mask are effective in preventing COVID 19 virus                   | 268   | 66.3% | 81      | 20.0% | 55       | 13.6% |
| Hand wash can prevent you from COVID 19 virus                                                 | 321   | 79.5  | 77      | 19.1  | 6        | 1.5   |
| Ethiopia is in a good position to contain COVID 19 virus                                      | 180   | 44.6  | 144     | 35.6  | 80       | 19.8  |
| COVID 19 is not stigma and I should not hide my infection                                     | 274   | 67.8  | 90      | 22.3  | 40       | 9.9   |
| If I get infected with COVID 19, I will go to the hospital as advised.                        | 221   | 54.7  | 141     | 34.9  | 42       | 10.4  |
| I can get infected with COVID 19 if I contacted an infected patient despite my good immunity. | 230   | 56.9  | 100     | 24.8  | 74       | 18.3  |
| COVID 19 is fatal                                                                             | 215   | 53.2  | 105     | 26.0  | 84       | 20.8  |
| During the outbreak of COVID 19 eating well cooked and safely handled meat is safe.           | 249   | 61.6  | 96      | 23.8  | 59       | 14.6  |
| COVID 19 patients should share their recent travel history with a health care provider.       | 256   | 63.4  | 85      | 21.0  | 63       | 15.6  |
| Do you think that the cause of Covid-19 is not spiritual/                                     | 262   | 64.9  | 87      | 21.5  | 55       | 13.6  |

|                                    |                                  |  |  |
|------------------------------------|----------------------------------|--|--|
| is it happened because of our sin? |                                  |  |  |
| Mean $\pm$ standard deviation      | <b>27.11<math>\pm</math>4.08</b> |  |  |
| Minimum                            | <b>17</b>                        |  |  |
| Maximum                            | <b>33</b>                        |  |  |

550

551 **Table 4:-Preventive practice of medical visitors towards COVID-19 in hospitals ofSouth**  
552 **Gondar zone, Northwest Ethiopia, in August 2020 (n=404)**

| Item                                                                                                                                                                             | Yes                             |      | No        |      |
|----------------------------------------------------------------------------------------------------------------------------------------------------------------------------------|---------------------------------|------|-----------|------|
|                                                                                                                                                                                  | Frequency                       | %    | Frequency | %    |
| Do you avoid handshaking to prevent covid 19?                                                                                                                                    | 363                             | 89.9 | 41        | 10.1 |
| Have you washed your hands often with soap and water for at least 20 seconds especially after you have been in a public place or after blowing your nose, coughing, or sneezing? | 378                             | 93.6 | 26        | 6.4  |
| If soap and water are not readily available, are you applying a hand sanitizer that contains at least 60% alcohol?                                                               | 309                             | 76.5 | 95        | 23.5 |
| Do you wear face masks repeatedly when you leave your home?                                                                                                                      | 338                             | 83.7 | 66        | 16.3 |
| Do you coughing and sneezing into the elbow or within clothing?                                                                                                                  | 333                             | 82.4 | 71        | 17.6 |
| In recent days have you avoid going to any crowded place?                                                                                                                        | 281                             | 69.6 | 123       | 30.4 |
| Do you avoid eating raw animal products to prevent the COVID 19 virus?                                                                                                           | 336                             | 83.2 | 68        | 16.8 |
| Do you avoid touching your mouth nose and eyes with unwashed hands?                                                                                                              | 323                             | 80.0 | 81        | 20.0 |
| Do you keep your self 2m away from the others when you got to the public area?                                                                                                   | 177                             | 43.8 | 227       | 56.2 |
| Do you stay at your home after the emergent of covid 19?                                                                                                                         | 121                             | 30.0 | 283       | 70.0 |
| Mean $\pm$ standard deviation                                                                                                                                                    | <b>7.32<math>\pm</math>1.60</b> |      |           |      |

|         |             |  |  |  |  |
|---------|-------------|--|--|--|--|
| Minimum | <b>1.00</b> |  |  |  |  |
| Maximum | <b>10</b>   |  |  |  |  |

553

554 **Table 5:-Predictors of knowledge towards COVID-19 among medical visitors in hospitals**  
555 **of South Gondar zone, Northwest Ethiopia, August 2020 (n = 404).**

| Variable              | Knowledge |      | COR(95% CI)        | AOR(95% CI)              | P-value       |
|-----------------------|-----------|------|--------------------|--------------------------|---------------|
|                       | Poor      | Good |                    |                          |               |
| Age                   |           |      |                    |                          |               |
| <20                   | 12        | 12   | 1                  | 1                        |               |
| 20-29                 | 22        | 70   | 3.182(1.252-8.085) | 1.98(0.54-7.29)          | 0.31          |
| 30-39                 | 29        | 82   | 2.828(1.144-6.992) | 1.08(0.30-3.87)          | .091          |
| 40-49                 | 39        | 58   | 1.611(.654-3.970)  | 1.06(0.31-3.68)          | 0.92          |
| 50-59                 | 15        | 33   | 2.200(.804-6.018)  | 1.21(0.30-4.82)          | 0.79          |
| ≥60                   | 10        | 25   | 2.500(.844-7.401)  | 0.69(0.16-2.95)          | 0.61          |
| Marital status        |           |      |                    |                          |               |
| Single                | 22        | 61   | 1                  | 1                        |               |
| Married               | 90        | 205  | 0.821(0.48-1.42)   | 0.88(0.42-1.82)          | 0.72          |
| Divorced              | 12        | 14   | 0.42(0.17-1.05)    | 0.92(0.29-2.98)          | 0.89          |
| <b>Education</b>      |           |      |                    |                          |               |
| cannot read and write | 41        | 25   | 1                  | 1                        |               |
| Read and write        | 41        | 54   | 2.16(1.14-4.12)    | <b>2.78(1.18-6.56)*</b>  | <b>0.02*</b>  |
| Primary               | 10        | 26   | 4.26(1.76-10.31)   | 2.42(0.56-10.44)         | 0.24          |
| Secondary             | 8         | 21   | 4.31(1.66-11.18)   | 1.54(0.25-9.56)          | 0.65          |
| College and above     | 24        | 154  | 10.52(10.52-5.45)  | <b>6.15(2.18-17.40)*</b> | <b>0.001*</b> |
| Occupation            |           |      |                    |                          |               |
| Farmer                | 45        | 23   | 1                  | 1                        |               |
| Student               | 12        | 33   | 5.38(2.35-12.34)   | 1.64(0.28-9.72)          | 0.59          |
| Currently unemployed  | 17        | 38   | 4.37(2.04-9.36)    | 1.50(0.49-4.58)          | 0.48          |
| Gov't worker          | 18        | 111  | 12.07(5.95-24.48)  | 0.83(0.16-4.19)          | 0.82          |

|                       |     |     |                 |                         |               |
|-----------------------|-----|-----|-----------------|-------------------------|---------------|
| Private business      | 32  | 75  | 4.59(2.39-8.80) | 0.91(0.25-3.30)         | 0.89          |
| Resident              |     |     |                 |                         |               |
| Urban                 | 71  | 216 | 2.52(1.60-3.96) | 1.427(0.75-2.71)        | 0.28          |
| Rural                 | 53  | 64  | 1               | 1                       |               |
| Monthly income        |     |     |                 |                         |               |
| <499                  | 54  | 73  | 1               | 1                       |               |
| 500-2000              | 34  | 67  | 1.46(0.85-2.51) | 1.272(0.52-3.09)        | 0.60          |
| >2000                 | 36  | 140 | 2.88(1.73-4.78) | 1.291(0.46-3.60)        | 0.63          |
| Training              |     |     |                 |                         |               |
| Yes                   | 24  | 113 | 2.82(1.70-4.67) | 1.74(0.89-3.42)         | 0.11          |
| No                    | 100 | 167 | 1               | 1                       |               |
| Use social media      |     |     |                 |                         |               |
| Yes                   | 48  | 204 | 4.25(2.72-6.65) | <b>2.96(1.46-6.01)*</b> | <b>0.003*</b> |
| No                    | 76  | 76  | 1               | 1                       |               |
| Peer                  |     |     |                 |                         |               |
| Yes                   | 93  | 252 | 3.00(1.71-5.27) | 1.09(0.48-2.51)         | 0.84          |
| No                    | 31  | 28  | 1               | 1                       |               |
| TV/radio              |     |     |                 |                         |               |
| Yes                   | 78  | 243 | 3.87(2.34-6.40) | 1.07(0.43-2.65)         | 0.88          |
| No                    | 46  | 37  | 1               | 1                       |               |
| Religious institution |     |     |                 |                         |               |
| Yes                   | 32  | 98  | 1.55(0.97-2.48) | 0.93(0.50-1.73)         | 0.83          |
| No                    | 92  | 182 | 1               | 1                       |               |

556

557

558

559 **~~Predictors of Attitude towards COVID-19~~** 

560 **Table 6:-Predictors**  of attitude towards COVID-19 among medical visitors in hospitals  
561 of South Gondar zone, Northwest Ethiopia, August 2020 (n = 404).

| Variable                   | Attitude |          | COR(CI)          | AOR(CI)                  | P-value                     |
|----------------------------|----------|----------|------------------|--------------------------|-----------------------------|
|                            | Negative | Positive |                  |                          |                             |
| Age                        |          |          |                  |                          |                             |
| <20                        | 12       | 12       | 1                | 1                        |                             |
| 20-29                      | 35       | 57       | 1.63(0.66-4.02)  | 0.42(0.12-1.46)          | 0.17                        |
| 30-39                      | 45       | 66       | 1.47(0.61-3.56)  | 0.51(0.14-1.82)          | 0.30                        |
| 40-49                      | 37       | 57       | 1.54(0.63-3.79)  | 0.94(0.28-3.21)          | 0.93                        |
| 50-59                      | 16       | 32       | 2.00(0.74-5.44)  | 1.10(0.28-4.27)          | 0.89                        |
| ≥60                        | 6        | 29       | 4.83(1.47-15.87) | 1.65(0.33-8.42)          | 0.55                        |
| Religion                   |          |          |                  |                          |                             |
| Muslim                     | 5        | 25       | 3.27(1.05-10.20) | 2.18(0.50-9.58)          | 0.30                        |
| Orthodox                   | 129      | 202      | 1.02(0.53-1.96)  | 1.49(0.64-3.48)          | 0.36                        |
| Protestant                 | 17       | 26       | 1                | 1                        |                             |
| <b>Education</b>           |          |          |                  |                          |                             |
| cannot read and write      | 44       | 22       | 1                | 1                        |                             |
| Read and write             | 48       | 47       | 1.96(1.02-3.76)  | 2.39(0.99-5.79)          | .053                        |
| Primary                    | 9        | 27       | 6.00(2.41-14.93) | <b>6.49(1.52-27.78)*</b> | <b>0.012*</b>               |
| secondary                  | 8        | 21       | 5.25(2.01-13.74) | 2.32(0.39-13.74)         | .35                         |
| College and above          | 42       | 136      | 6.48(3.49-12.01) | <b>6.91(2.58-14.50)*</b> | <b>0.0001*</b> <sup>^</sup> |
| Occupation                 |          |          |                  |                          |                             |
| Farmer                     | 46       | 22       | 1                | 1                        |                             |
| Student                    | 9        | 36       | 8.36(3.44-20.36) | 1.87(0.33-10.72)         | 0.48                        |
| Currently unemployed       | 22       | 33       | 3.14(1.50-6.58)  | .54(0.18-1.68)           | 0.29                        |
| Gov't worker               | 24       | 105      | 9.15(4.66-17.96) | .61(0.12-3.05)           | 0.55                        |
| Private business           | 50       | 57       | 2.38(1.26-4.50)  | .29(0.07-1.12)           | 0.07                        |
| Resident                   |          |          |                  |                          |                             |
| Urban                      | 94       | 193      | 1.95(1.26-3.02)  | 1.23(0.66-2.23)          | 0.51                        |
| Rural                      | 57       | 60       | 1                | 1                        |                             |
| Monthly income             |          |          |                  |                          |                             |
| <499                       | 55       | 72       | 1                | 1                        |                             |
| 500-2000                   | 40       | 61       | 1.17(0.69-1.98)  | .893(0.33-2.38)          | 0.82                        |
| >2000                      | 56       | 120      | 1.64(1.02-2.63)  | .569(0.19-1.70)          | 0.31                        |
| History of chronic illness |          |          |                  |                          |                             |
| Yes                        | 8        | 48       | 4.19(1.92-9.12)  | <b>5.00(1.71-14.67)*</b> | <b>0.003*</b>               |
| No                         | 143      | 205      | 1                | 1                        |                             |
| Training                   |          |          |                  |                          |                             |
| Yes                        | 24       | 113      | 4.27(2.59-7.05)  | <b>3.9(1.96-7.70)*</b>   | <b>0.0001*</b>              |
| No                         | 127      | 140      | 1                | 1                        |                             |
| Use social                 |          |          |                  |                          |                             |

|                       |     |     |                 |                         |              |
|-----------------------|-----|-----|-----------------|-------------------------|--------------|
| media                 |     |     |                 |                         |              |
| Yes                   | 73  | 179 | 2.59(1.70-3.93) | 1.20(0.59-2.44)         | 0.63         |
| No                    | 78  | 74  | 1               | 1                       |              |
| Peer                  |     |     |                 |                         |              |
| Yes                   | 114 | 231 | 3.41(1.92-60.5) | <b>2.45(1.06-5.63)*</b> | <b>0.04*</b> |
| No                    | 37  | 22  | 1               | 1                       |              |
| Tv/radio              |     |     |                 |                         |              |
| Yes                   | 100 | 221 | 3.52(2.13-5.81) | 2.091(0.85-5.16)        | 0.11         |
| No                    | 51  | 32  | 1               | 1                       |              |
| Religious institution |     |     |                 |                         |              |
| Yes                   | 30  | 100 | 2.64(1.64-4.23) | 1.725(0.93-3.21)        | 0.09         |
| No                    | 121 | 153 | 1               | 1                       |              |

562

563 ~~**Predictors of preventive practice towards COVID-19**~~

564 **Table 7: Predictors of preventive practice towards COVID-19 among medical visitors in**  
 565 **hospitals of South Gondar zone, Northwest Ethiopia, August 2020 (n = 404).**

| Variable              | poor practice | good practice | COR(CI)            | AOR(CI)                  | P-value      |
|-----------------------|---------------|---------------|--------------------|--------------------------|--------------|
| <b>Age</b>            |               |               |                    |                          |              |
| <20                   | 15            | 9             | 1                  | 1                        |              |
| 20-29                 | 44            | 48            | 1.82(0.72-4.57)    | .87(0.24-3.38)           | 0.84         |
| 30-39                 | 62            | 49            | 1.32(0.53-3.26)    | .43(0.12-1.67)           | 0.22         |
| 40-49                 | 53            | 41            | 1.29(0.51-3.24)    | .75(0.20-2.56)           | 0.67         |
| 50-59                 | 21            | 27            | 2.14(0.79-5.85)    | .99(0.23-4.24)           | 0.98         |
| ≥60                   | 10            | 25            | 4.17(1.38-12.58)   | 1.31(0.28-6.11)          | 0.73         |
| <b>Education</b>      |               |               |                    |                          |              |
| cannot read and write | 49            | 17            | 1                  | 1                        |              |
| Read and write        | 70            | 25            | 1.03(0.50-2.11)    | .93(0.36-2.43)           | 0.88         |
| primary               | 20            | 16            | 2.31(0.98-5.44)    | .39(0.08-1.80)           | 0.23         |
| secondary             | 12            | 17            | 4.08(1.62-10.27)   | .82(0.16-4.19)           | 0.82         |
| College and above     | 54            | 124           | 6.62(3.50-12.52)   | 1.90(0.67-5.17)          | 0.21         |
| <b>Occupation</b>     |               |               |                    |                          |              |
| Farmer                | 62            | 6             | 1                  | 1                        |              |
| Student               | 21            | 24            | 11.81(4.25-32.83)  | <b>7.70(1.15-15.86)*</b> | <b>0.04*</b> |
| Currently unemployed  | 35            | 20            | 5.91(2.17-16.08)   | 2.35(0.58-9.57)          | 0.23         |
| Gov't worker          | 36            | 93            | 26.70(10.62-67.12) | 2.49(0.42-14.61)         | 0.31         |
| Private business      | 51            | 56            | 11.35(4.52-28.47)  | 2.15(0.45-10.2)          | 0.34         |



|                         |     |     |                  |                         |                |
|-------------------------|-----|-----|------------------|-------------------------|----------------|
| <b>Resident</b>         |     |     |                  |                         |                |
| Urban                   | 121 | 166 | 3.49(2.19-5.56)  | 1.54(0.79-3.00)         | 0.21           |
| Rural                   | 84  | 33  | 1                | 1                       |                |
| <b>Monthly income</b>   |     |     |                  |                         |                |
| <499                    | 88  | 39  | 1                | 1                       |                |
| 500-2000                | 51  | 50  | 2.21(1.29-3.81)  | 2.05(0.71-5.93)         | 0.19           |
| >2000                   | 66  | 110 | 3.76(2.32-6.12)  | 1.99(0.62-6.39)         | 0.25           |
| <b>Training</b>         |     |     |                  |                         |                |
| Yes                     | 51  | 86  | 2.30(1.51-3.51)  | 0.88(0.47-1.64)         | 0.68           |
| No                      | 154 | 113 | 1                | 1                       |                |
| <b>Use social media</b> |     |     |                  |                         |                |
| Yes                     | 92  | 160 | 5.04(3.23-7.87)  | 1.54(0.76-3.10)         | 0.23           |
| No                      | 113 | 39  | 1                | 1                       |                |
| <b>Peer</b>             |     |     |                  |                         |                |
| Yes                     | 161 | 184 | 3.35(1.80-6.25)  | 0.78(0.31-1.97)         | 0.61           |
| No                      | 44  | 15  | 1                | 1                       |                |
| <b>Tv/radio</b>         |     |     |                  |                         |                |
| Yes                     | 136 | 185 | 6.70(3.62-12.41) | 1.45(0.53-3.96)         | 0.46           |
| No                      | 69  | 14  | 1                | 1                       |                |
| <b>Knowledge</b>        |     |     |                  |                         |                |
| Poor knowledge          | 102 | 22  | 1                | 1                       |                |
| Good knowledge          | 103 | 177 | 7.97(4.73-13.41) | <b>4.49(2.41-8.39)*</b> | <b>0.0001*</b> |
| <b>attitude</b>         |     |     |                  |                         |                |
| Negative attitude       | 107 | 44  | 1                | 1                       |                |
| Positive attitude       | 98  | 155 | 3.85(2.50-5.93)  | 1.04(0.58-1.86)         | .068           |

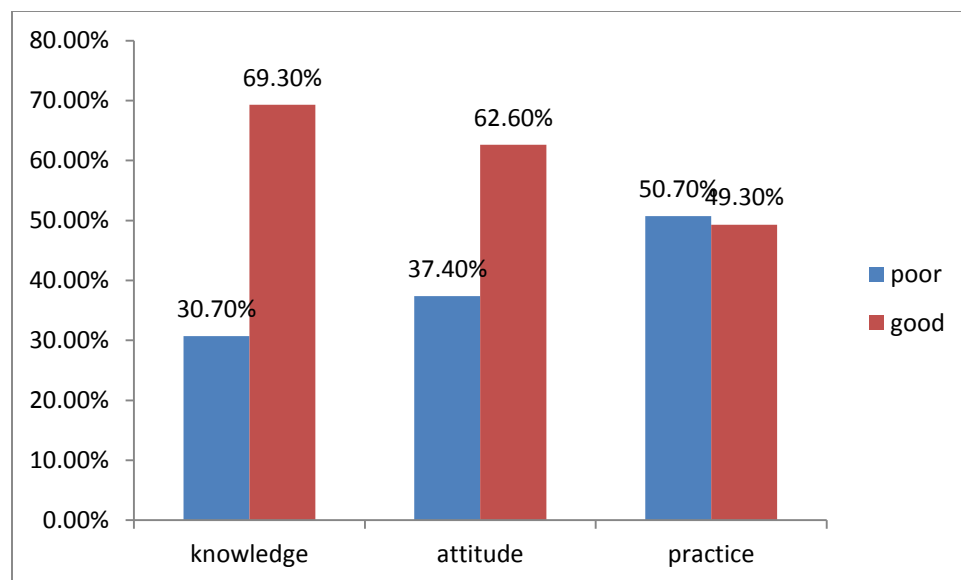

**Fig1:-Status of Knowledge Attitude and Practice among Medical visitors in hospitals of South Gondar Zone, Northwest Ethiopia, in August 2020**

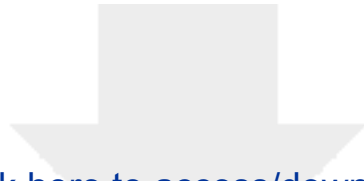

Click here to access/download  
**Supporting Information**  
patient final manuscript - submitted.docx

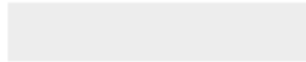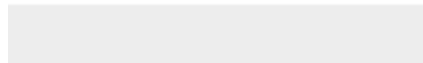

Supplement: pone.0250145.s005.pdf [file pone.0250145.s005.pdf]
